# Supplementary material for: Intravenous immunoglobulin treatment for mild Guillain-Barré syndrome: an international observational study
Source: PubMed Central journal article supplement — J Neurol Neurosurg Psychiatry. 2021 Jun 8;92(10):1080–8. doi: 10.1136/jnnp-2020-325815 (PMC8458059; doi:10.1136/jnnp-2020-325815), 2021-06-08
Supplement: jnnp-2020-325815supp001.pdf [file jnnp-2020-325815supp001.pdf]

## SUPPLEMENTARY MATERIAL

**Table 1.** Baseline and clinical patient characteristics in patients with persistent mild GBS.

|                                            | Supportive care group<br>n=29 | IVIg group<br>n=82 | p-value |
|--------------------------------------------|-------------------------------|--------------------|---------|
| Male, n (%)                                | 17 (59)                       | 57 (70)            | 0.29    |
| Age, y, median (IQR)                       | 54 (33-59)                    | 43 (34-58)         | 0.32    |
| Region, n (%)                              |                               |                    | 0.03    |
| Europe                                     | 24 (83)                       | 58 (71)            |         |
| Americas                                   | 2 (7)                         | 15 (18)            |         |
| Asia                                       | 1 (3)                         | 9 (11)             |         |
| Africa                                     | 2 (7)                         | 0 (0)              |         |
| Australia                                  | 0 (0)                         | 0 (0)              |         |
| Antecedent event, n (%)                    |                               |                    |         |
| URTI                                       | 13/28 (54)                    | 34 (42)            | 0.27    |
| Diarrhoea                                  | 5/28 (18)                     | 28 (34)            | 0.10    |
| Other                                      | 3/28 (11)                     | 9 (11)             | 1.00    |
| None                                       | 5/28 (18)                     | 11 (13)            | 0.57    |
| <b>CHARACTERISTICS AT ENTRY</b>            |                               |                    |         |
| Pain, n (%)                                | 15/28 (54)                    | 40 (49)            | 0.66    |
| Cranial nerve involvement, n (%)           | 8 (28)                        | 27 (33)            | 0.60    |
| Oculomotor                                 | 1 (3)                         | 4 (5)              | 1.00    |
| Facial                                     | 6 (21)                        | 21 (26)            | 0.60    |
| Bulbar                                     | 1 (3)                         | 8 (10)             | 0.44    |
| MRC sum score, median (IQR)                | 54 (52-58)                    | 55 (51-58)         | 0.99    |
| Sensory deficits, n (%)                    | 14 (48)                       | 48 (59)            | 0.34    |
| Ataxia, n (%)                              | 6/28 (21)                     | 24/78 (31)         | 0.35    |
| GBS disability score, n (%)                |                               |                    | 0.32    |
| Minor symptoms (1)                         | 5 (17)                        | 8 (10)             |         |
| Able to walk independently (2)             | 24 (83)                       | 74 (90)            |         |
| Autonomic dysfunction, n (%)               | 0/28 (0)                      | 14 (17)            | 0.02    |
| GBS clinical variant <sup>1</sup> , n (%)  |                               |                    |         |
| Sensorimotor                               | 18 (62)                       | 63 (77)            | 0.12    |
| Pure motor                                 | 9 (30)                        | 13 (16)            | 0.08    |
| MFS-GBS-overlap                            | 1 (3)                         | 4 (5)              | 1.00    |
| Pharyngeal-cervical-brachial               | 1 (3)                         | 2 (2)              | 1.00    |
| <b>ADDITIONAL INVESTIGATION</b>            |                               |                    |         |
| Electrophysiological classification (n, %) |                               |                    |         |
| Demyelinating                              | 10/25 (40)                    | 40/70 (57)         | 0.14    |

|             |            |            |      |
|-------------|------------|------------|------|
| Axonal      | 1/25 (4)   | 2/70 (3)   | 1.00 |
| Inexcitable | 0/25 (0)   | 0/70 (0)   | na   |
| Equivocal   | 13/25 (52) | 24/70 (34) | 0.12 |
| Normal      | 1/25 (4)   | 4/70 (6)   | 1.00 |

<sup>1</sup> Determined at week 2

Abbreviations: GBS = Guillain-Barré syndrome, IQR = interquartile range, IVIg = intravenous immunoglobulin, MFS = Miller Fisher syndrome, MRC = Medical Research Council, na = not applicable, URTI = upper respiratory tract infection
